# Supplementary material
Source: Springer Nature journal article supplement (https://www.springermedizin.de/resource/supplementary/13075_2013_4432_MOESM7_ESM.pdf/10110394)

Figure S6

A

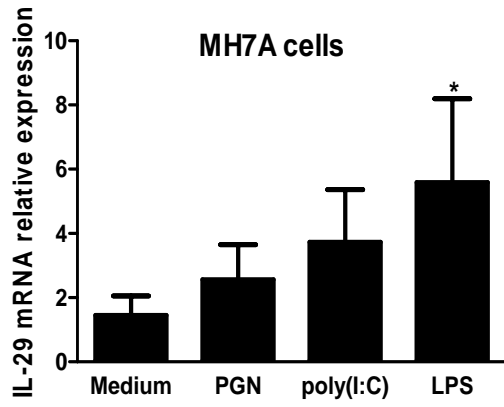

B

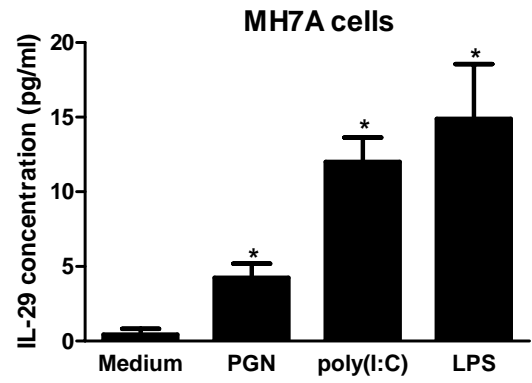

C

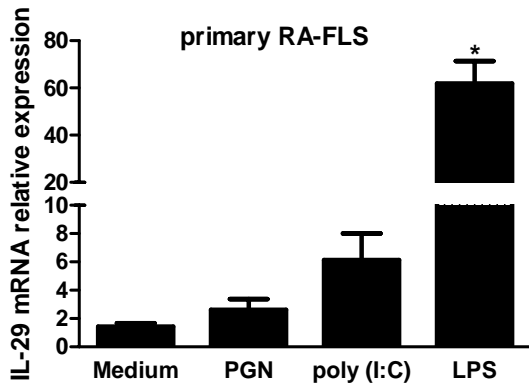

D

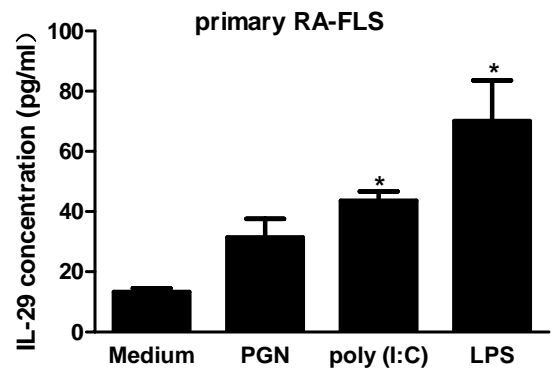

Supplement: MOESM7 [file 10110394]
